# Supplementary material for: Fetal cannabidiol (CBD) exposure alters thermal pain sensitivity, problem-solving, and prefrontal cortex excitability
Source: PubMed Central journal article supplement (PMC10618089; doi:10.1038/s41380-023-02130-y), 2023-07-11
Supplement: 41380_2023_2130_MOESM1_ESM.pdf [file 41380_2023_2130_MOESM1_ESM.pdf]

Table 1. Data for anxiety-like behavior

| Test               | Measure                                | Female Vehicle |           |                      | Female CBD |           |                      | Female Effect Size | Female vehicle to female CBD | Distrobution | Test used              |
|--------------------|----------------------------------------|----------------|-----------|----------------------|------------|-----------|----------------------|--------------------|------------------------------|--------------|------------------------|
|                    |                                        | N pups         | N litters | Value $\pm$ SEM      | N pups     | N litters | Value $\pm$ SEM      | Vehicle - CBD Mean | P value                      |              |                        |
| Open field test    | Freuqncy in center zone                | 13             | 5         | 49.93 $\pm$ 3.83     | 25         | 7         | 50.12 $\pm$ 2.29     | -0.19              | 0.965                        | Normal       | T-Test                 |
| Open field test    | Velocity (cm/s)                        | 13             | 5         | 11.34 $\pm$ 0.92     | 25         | 7         | 10.88 $\pm$ 0.51     | 0.46               | 0.525                        | Nonnormal    | Wilcoxin rank sum test |
| Open field test    | Total distance moved (cm)              | 13             | 5         | 932.47 $\pm$ 81.25   | 25         | 7         | 925.19 $\pm$ 50.00   | 7.28               | 0.936                        | Normal       | T-Test                 |
| Open field test    | Time in center zone (s)                | 13             | 5         | 90.20 $\pm$ 11.05    | 25         | 7         | 89.19 $\pm$ 6.36     | 1.01               | 0.933                        | Normal       | T-Test                 |
| Open field test    | Time moving (s)                        | 13             | 5         | 70.46 $\pm$ 7.65     | 25         | 7         | 71.90 $\pm$ 4.62     | -1.44              | 0.865                        | Normal       | T-Test                 |
| Open field test    | Time still (s)                         | 13             | 5         | 19.72 $\pm$ 3.82     | 25         | 7         | 17.28 $\pm$ 2.10     | 2.44               | 0.225                        | Nonnormal    | Wilcoxin rank sum test |
| Light dark box     | Total distance moved in open area (cm) | 6              | 3         | 740.45 $\pm$ 106.50  | 21         | 5         | 1033.55 $\pm$ 92.01  | -293.1             | 0.071                        | Nonnormal    | Wilcoxin rank sum test |
| Light dark box     | Mean velocity (cm/s)                   | 6              | 3         | 6.79 $\pm$ 0.30      | 21         | 5         | 6.83 $\pm$ 0.29      | -0.04              | 0.572                        | Nonnormal    | Wilcoxin rank sum test |
| Light dark box     | Duration in open area (s)              | 6              | 3         | 263.09 $\pm$ 17.52   | 21         | 5         | 234.12 $\pm$ 11.89   | 28.97              | 0.225                        | Nonnormal    | Wilcoxin rank sum test |
| Light dark box     | Duration in near zone (s)              | 6              | 3         | 219.84 $\pm$ 16.48   | 21         | 5         | 159.26 $\pm$ 15.01   | 60.58              | 0.052                        | Normal       | T-Test                 |
| Light dark box     | Duration in middle zone (s)            | 6              | 3         | 17.34 $\pm$ 3.37     | 21         | 5         | 27.23 $\pm$ 2.54     | -9.89              | 0.082                        | Normal       | T-Test                 |
| Light dark box     | Duration in far zone (s)               | 6              | 3         | 25.28 $\pm$ 5.92     | 21         | 5         | 47.62 $\pm$ 11.22    | -22.34             | 0.306                        | Nonnormal    | Wilcoxin rank sum test |
| Light dark box     | Latency to enter near zone (s)         | 6              | 3         | 1.49 $\pm$ 0.82      | 21         | 5         | 6.90 $\pm$ 4.79      | -5.41              | 0.978                        | Nonnormal    | Wilcoxin rank sum test |
| Light dark box     | Latency to enter middle zone (s)       | 6              | 3         | 2.15 $\pm$ 1.17      | 21         | 5         | 18.85 $\pm$ 6.12     | -16.7              | 0.112                        | Nonnormal    | Wilcoxin rank sum test |
| Light dark box     | Latency to enter far zone (s)          | 6              | 3         | 10.488 $\pm$ 5.497   | 21         | 5         | 20.30 $\pm$ 6.25     | -9.812             | 0.428                        | Nonnormal    | Wilcoxin rank sum test |
| Light dark box     | Frequency in near zone                 | 6              | 3         | 19.83 $\pm$ 3.84     | 21         | 5         | 27.33 $\pm$ 2.87     | -7.5               | 0.207                        | Normal       | T-Test                 |
| Light dark box     | Frequency in middle zone               | 6              | 3         | 5.59 $\pm$ 2.28      | 21         | 5         | 20.33 $\pm$ 1.97     | -14.74             | 0.184                        | Normal       | T-Test                 |
| Light dark box     | Frequency in far zone                  | 6              | 3         | 7.00 $\pm$ 1.39      | 21         | 5         | 10.95 $\pm$ 1.55     | -3.95              | 0.124                        | Nonnormal    | Wilcoxin rank sum test |
| Elevated zero maze | Velocity (cm/s)                        | 13             | 5         | 5.27 $\pm$ 0.36      | 25         | 7         | 5.25 $\pm$ 0.26      | 0.02               | 0.969                        | Normal       | T-Test                 |
| Elevated zero maze | Frequency in light area                | 13             | 5         | 33.85 $\pm$ 3.35     | 25         | 7         | 31.68 $\pm$ 2.17     | 2.17               | 0.577                        | Normal       | T-Test                 |
| Elevated zero maze | Total distance moved (cm)              | 13             | 5         | 1573.94 $\pm$ 108.78 | 25         | 7         | 1570.05 $\pm$ 77.47  | 3.89               | 0.976                        | Normal       | T-Test                 |
| Elevated zero maze | Time in closed area (s)                | 13             | 5         | 212.67 $\pm$ 9.16    | 25         | 7         | 206.69 $\pm$ 6.93    | 5.98               | 0.977                        | Nonnormal.   | Wilcoxin rank sum test |
| Elevated zero maze | Time in open area (s)                  | 13             | 5         | 87.43 $\pm$ 9.16     | 25         | 7         | 93.41 $\pm$ 6.93     | -5.98              | 0.977                        | Nonnormal    | Wilcoxin rank sum test |
| Elevated zero maze | Frequncy in closed area                | 13             | 5         | 34 $\pm$ 3.34        | 25         | 7         | 31.6 $\pm$ 2.14      | 2.4                | 0.534                        | Normal       | T-Test                 |
| Test               | Measure                                | Male Vehicle   |           |                      | Male CBD   |           |                      | Male Effect Size   | Male vehicle to Male CBD     | Distrobution | Test used              |
|                    |                                        | N pups         | N litters | Value $\pm$ SEM      | N pups     | N litters | Value $\pm$ SEM      | Vehicle - CBD Mean | P value                      |              |                        |
| Open field test    | Freuqncy in center zone                | 19             | 6         | 49.26 $\pm$ 4.78     | 23         | 7         | 48.87 $\pm$ 2.88     | 0.39               | 0.942                        | Normal       | T-Test                 |
| Open field test    | Velocity (cm/s)                        | 19             | 6         | 10.69 $\pm$ 0.63     | 23         | 7         | 10.71 $\pm$ 0.54     | -0.02              | 0.978                        | Nonnormal    | Wilcoxin rank sum test |
| Open field test    | Total distance moved (cm)              | 19             | 6         | 913.97 $\pm$ 90.52   | 23         | 7         | 930.76 $\pm$ 53.62   | -16.79             | 0.869                        | Normal       | T-Test                 |
| Open field test    | Time in center zone (s)                | 19             | 6         | 89.40 $\pm$ 10.05    | 23         | 7         | 90.76 $\pm$ 6.00     | -1.36              | 0.904                        | Normal       | T-Test                 |
| Open field test    | Time moving (s)                        | 19             | 6         | 70.76 $\pm$ 6.95     | 23         | 7         | 72.53 $\pm$ 4.07     | -1.77              | 0.821                        | Normal       | T-Test                 |
| Open field test    | Time still (s)                         | 19             | 6         | 18.63 $\pm$ 3.72     | 23         | 7         | 18.23 $\pm$ 2.35     | 0.4                | 0.551                        | Nonnormal    | Wilcoxin rank sum test |
| Light dark box     | Total distance moved in open area (cm) | 13             | 4         | 854.22 $\pm$ 89.37   | 24         | 6         | 1191.09 $\pm$ 165.01 | -336.87            | 0.105                        | Nonnormal    | Wilcoxin rank sum test |
| Light dark box     | Mean velocity (cm/s)                   | 13             | 4         | 7.12 $\pm$ 0.23      | 24         | 6         | 6.99 $\pm$ 0.50      | 0.13               | 0.484                        | Nonnormal    | Wilcoxin rank sum test |
| Light dark box     | Duration in open area (s)              | 13             | 4         | 233.82 $\pm$ 18.18   | 24         | 6         | 246.27 $\pm$ 14.30   | -12.45             | 0.239                        | Nonnormal    | Wilcoxin rank sum test |
| Light dark box     | Duration in near zone (s)              | 13             | 4         | 180.42 $\pm$ 19.22   | 24         | 6         | 179.64 $\pm$ 13.14   | 0.78               | 0.973                        | Normal       | T-Test                 |
| Light dark box     | Duration in middle zone (s)            | 13             | 4         | 21.65 $\pm$ 2.99     | 24         | 6         | 31.87 $\pm$ 2.38     | -10.22             | 0.014                        | Normal       | T-Test                 |
| Light dark box     | Duration in far zone (s)               | 13             | 4         | 31.75 $\pm$ 3.49     | 24         | 6         | 37.65 $\pm$ 2.78     | -5.9               | 0.156                        | Nonnormal    | Wilcoxin rank sum test |
| Light dark box     | Latency to enter near zone (s)         | 13             | 4         | 3.57 $\pm$ 2.82      | 24         | 6         | 3.61 $\pm$ 1.68      | -0.04              | 0.766                        | Nonnormal    | Wilcoxin rank sum test |
| Light dark box     | Latency to enter middle zone (s)       | 13             | 4         | 12.98 $\pm$ 4.98     | 24         | 6         | 13.35 $\pm$ 4.37     | -0.37              | 0.915                        | Nonnormal    | Wilcoxin rank sum test |
| Light dark box     | Latency to enter far zone (s)          | 13             | 4         | 16.19 $\pm$ 5.65     | 24         | 6         | 15.85 $\pm$ 4.60     | 0.34               | 0.965                        | Nonnormal    | Wilcoxin rank sum test |
| Light dark box     | Frequency in near zone                 | 13             | 4         | 21.23 $\pm$ 2.52     | 24         | 6         | 24.79 $\pm$ 2.67     | -3.56              | 0.391                        | Normal       | T-Test                 |
| Light dark box     | Frequency in middle zone               | 13             | 4         | 18.62 $\pm$ 1.95     | 24         | 6         | 22.25 $\pm$ 1.72     | -3.63              | 0.196                        | Normal       | T-Test                 |
| Light dark box     | Frequency in far zone                  | 13             | 4         | 8.85 $\pm$ 0.89      | 24         | 6         | 10.54 $\pm$ 0.87     | -1.69              | 0.193                        | Nonnormal    | Wilcoxin rank sum test |
| Elevated zero maze | Velocity (cm/s)                        | 23             | 7         | 4.79 $\pm$ 0.26      | 24         | 7         | 4.92 $\pm$ 0.26      | -0.13              | 0.733                        | Normal       | T-Test                 |
| Elevated zero maze | Frequency in light area                | 23             | 7         | 27.43 $\pm$ 2.15     | 24         | 7         | 27.04 $\pm$ 2.29     | 0.39               | 0.901                        | Normal       | T-Test                 |
| Elevated zero maze | Total distance moved (cm)              | 23             | 7         | 1437.06 $\pm$ 78.82  | 24         | 7         | 1474.54 $\pm$ 79.04  | -37.48             | 0.739                        | Normal       | T-Test                 |
| Elevated zero maze | Time in closed area (s)                | 23             | 7         | 222.98 $\pm$ 6.21    | 24         | 7         | 218.35 $\pm$ 5.76    | 4.63               | 0.395                        | Nonnormal.   | Wilcoxin rank sum test |
| Elevated zero maze | Time in open area (s)                  | 23             | 7         | 77.12 $\pm$ 6.22     | 24         | 7         | 81.75 $\pm$ 5.76     | -4.63              | 0.395                        | Nonnormal    | Wilcoxin rank sum test |
| Elevated zero maze | Frequncy in closed area                | 23             | 7         | 27.30 $\pm$ 2.18     | 24         | 7         | 26.92 $\pm$ 2.32     | 0.38               | 0.904                        | Normal       | T-Test                 |
