# Supplementary material for: Fetal cannabidiol (CBD) exposure alters thermal pain sensitivity, problem-solving, and prefrontal cortex excitability
Source: PubMed Central journal article supplement (PMC10618089; doi:10.1038/s41380-023-02130-y), 2023-07-11

Open field test

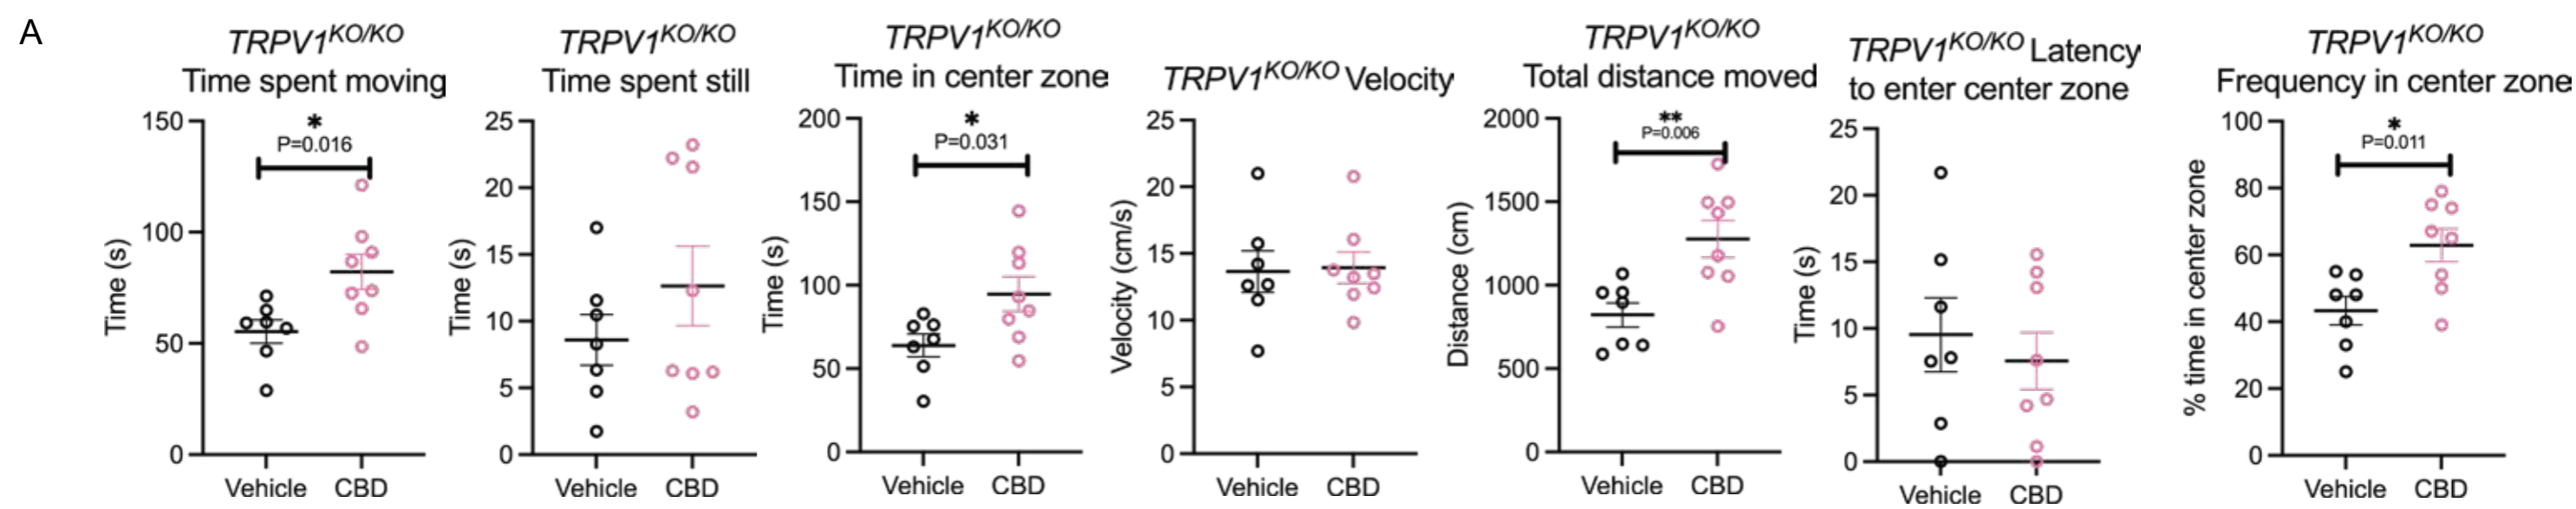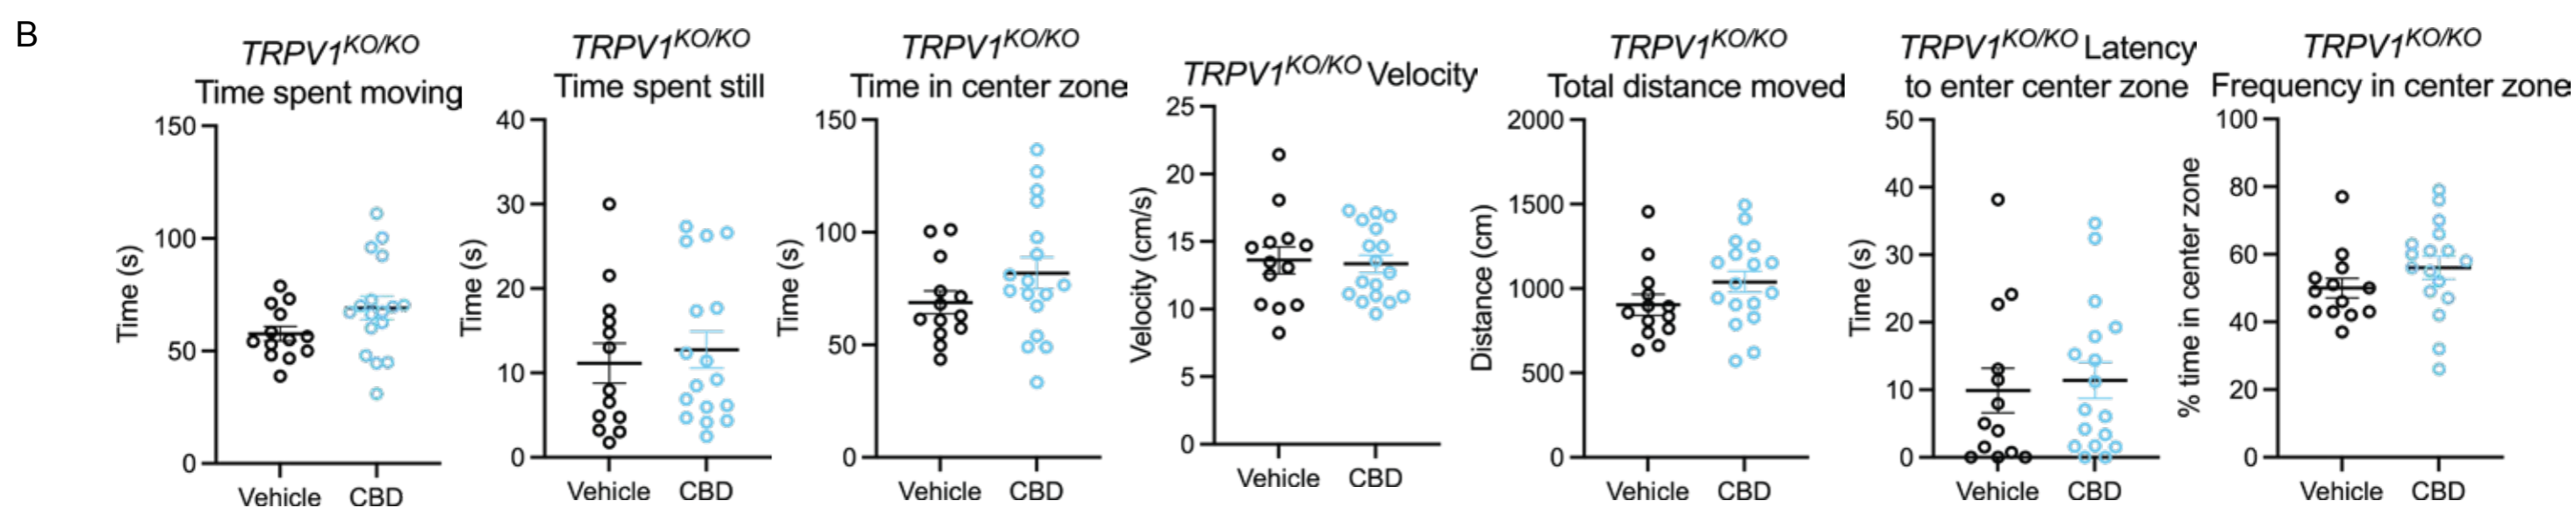

Light dark box

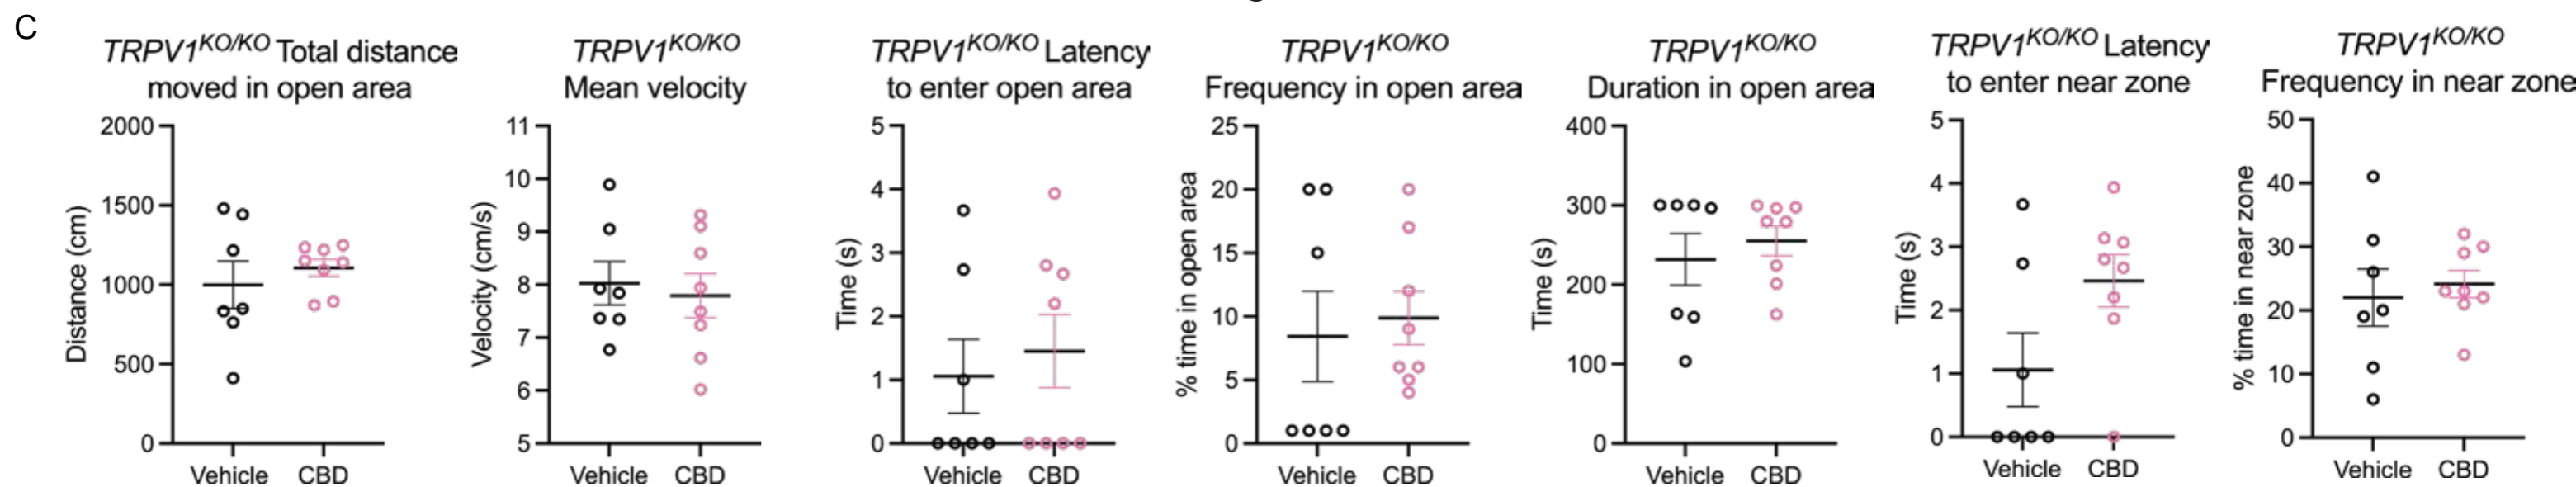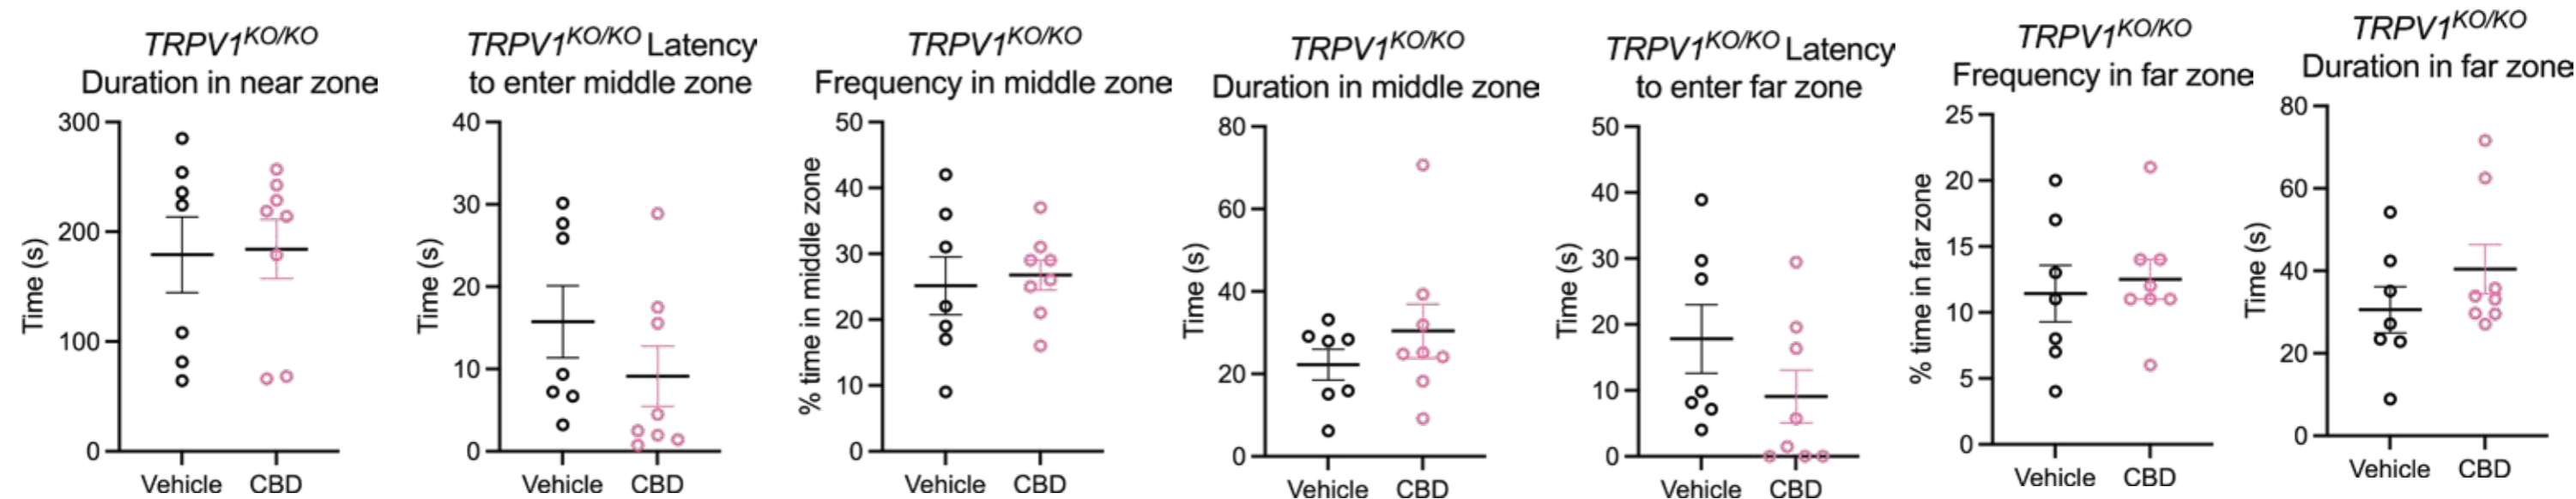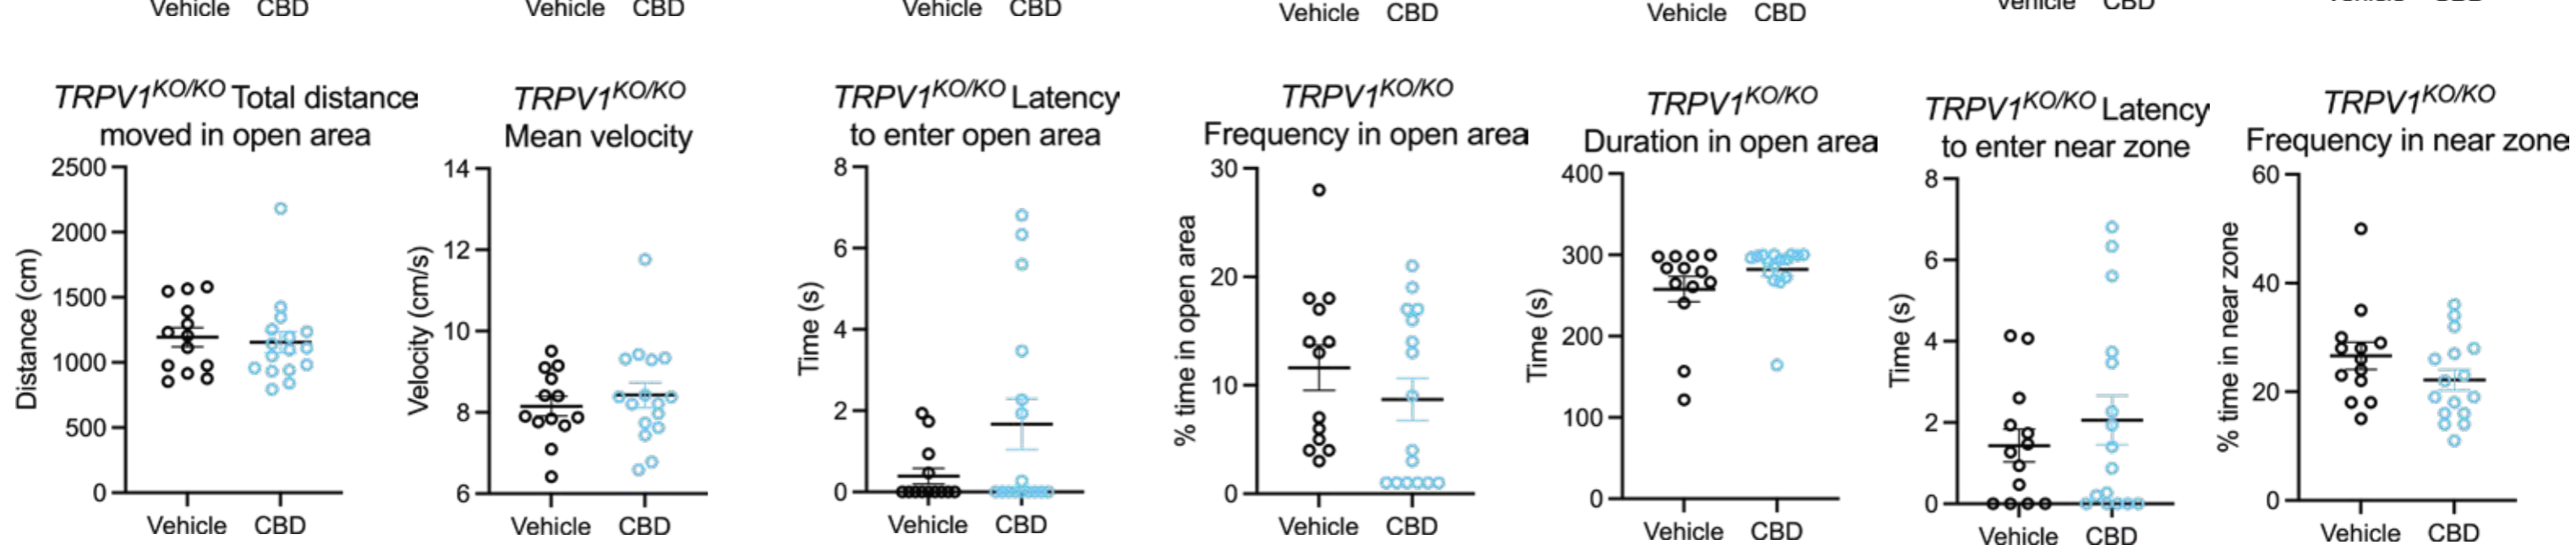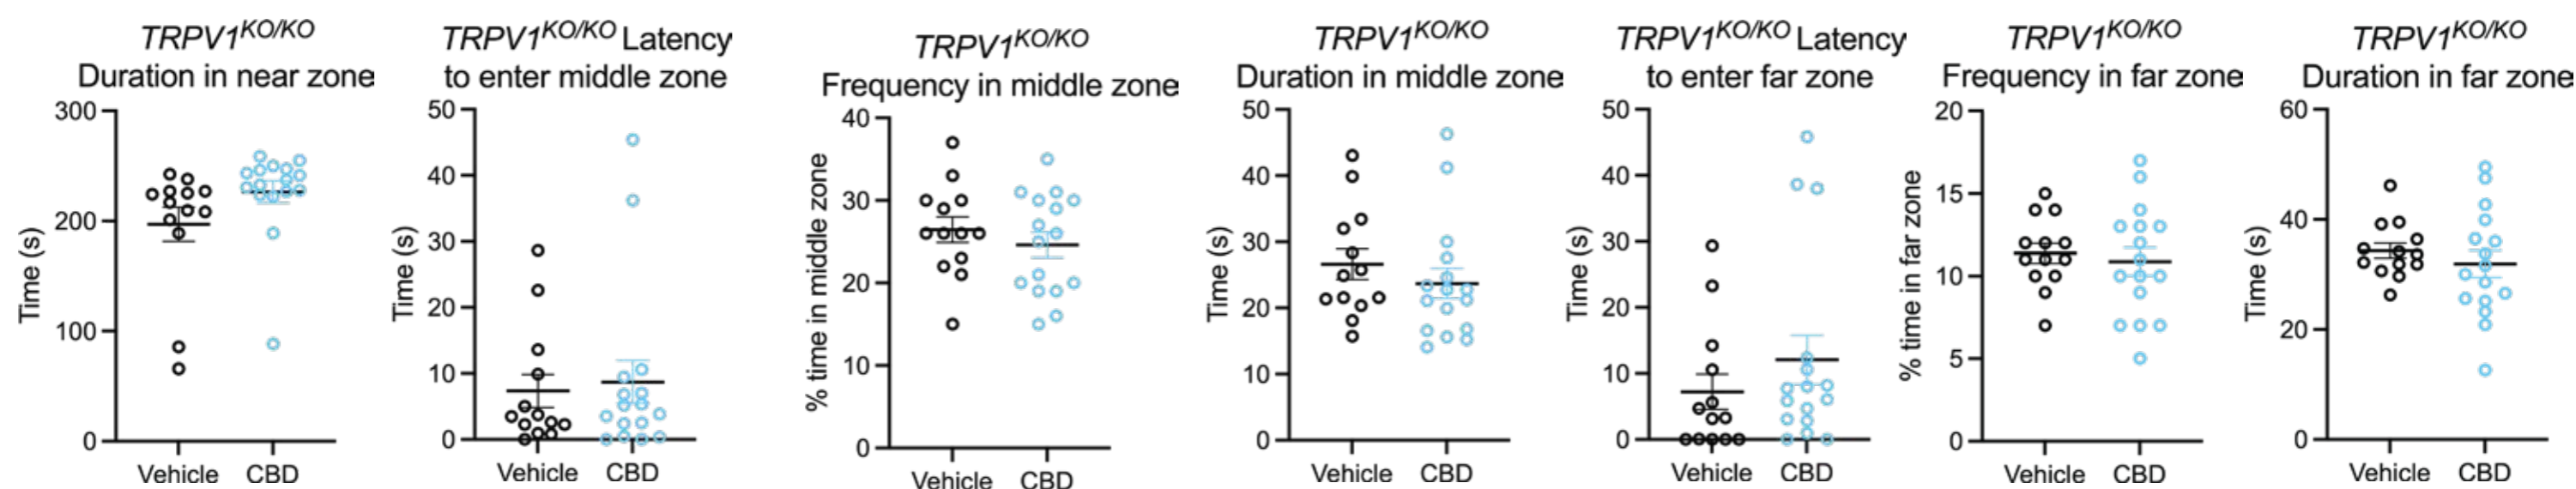

Supplement: 41380_2023_2130_MOESM2_ESM.pdf [file 41380_2023_2130_MOESM2_ESM.pdf]
